# Supplementary material
Source: ML conference proceedings conference paper supplement (https://openreview.net/forum?id=Z-mRKVaxVU3)

# Training

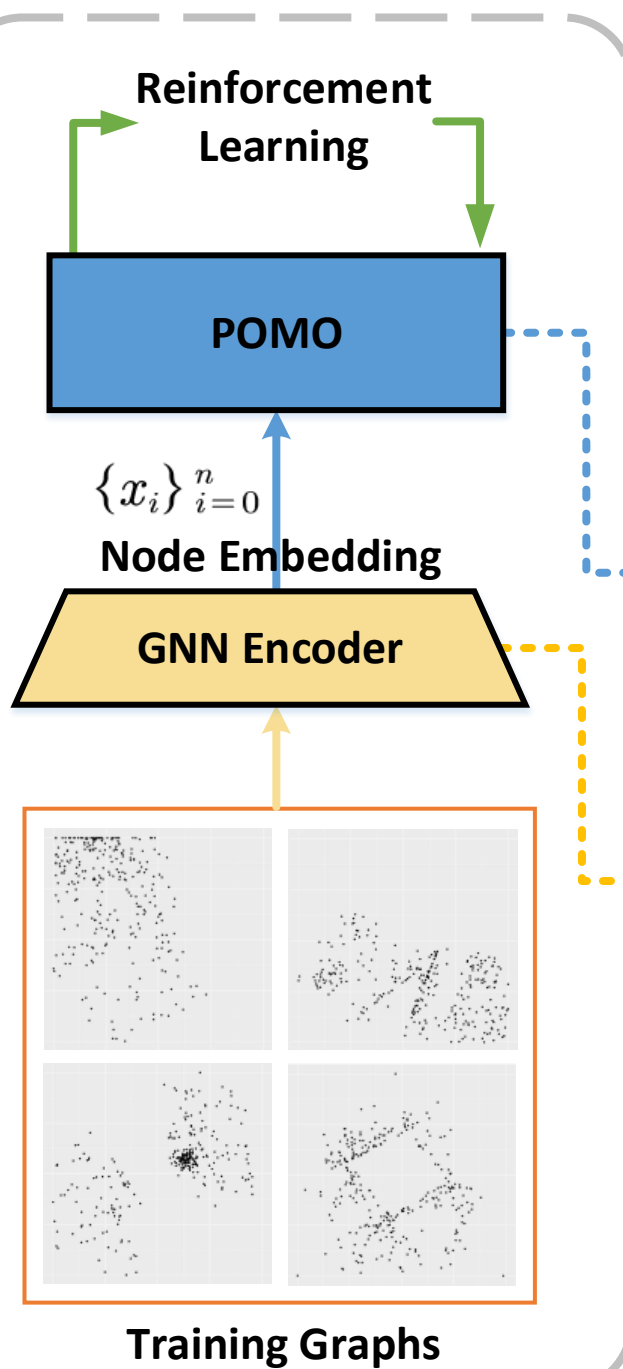

# Inference

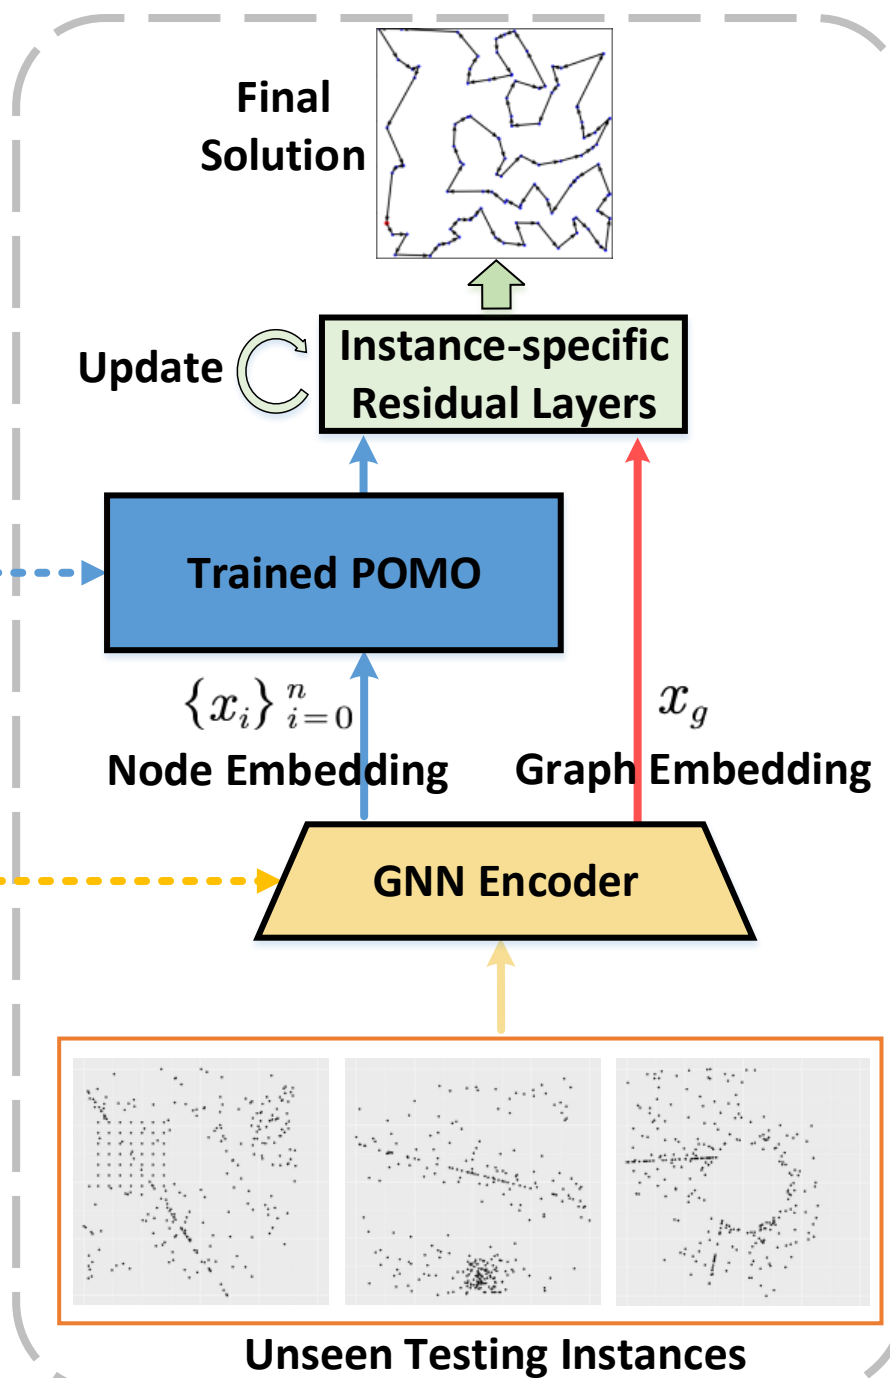

Supplement: supplementary_material [file attachment]

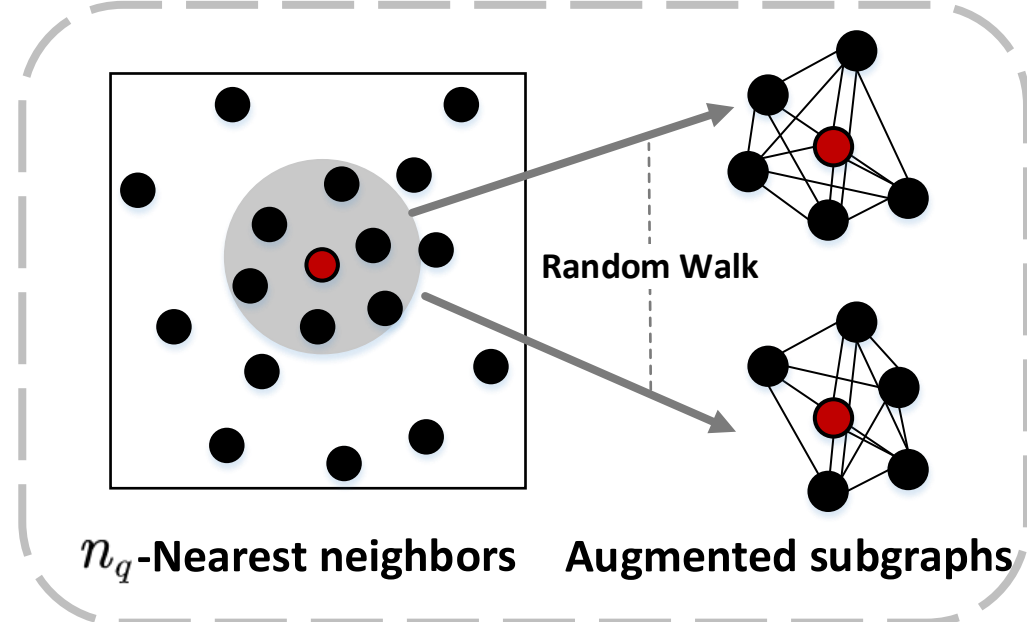

(a) Node augmentation

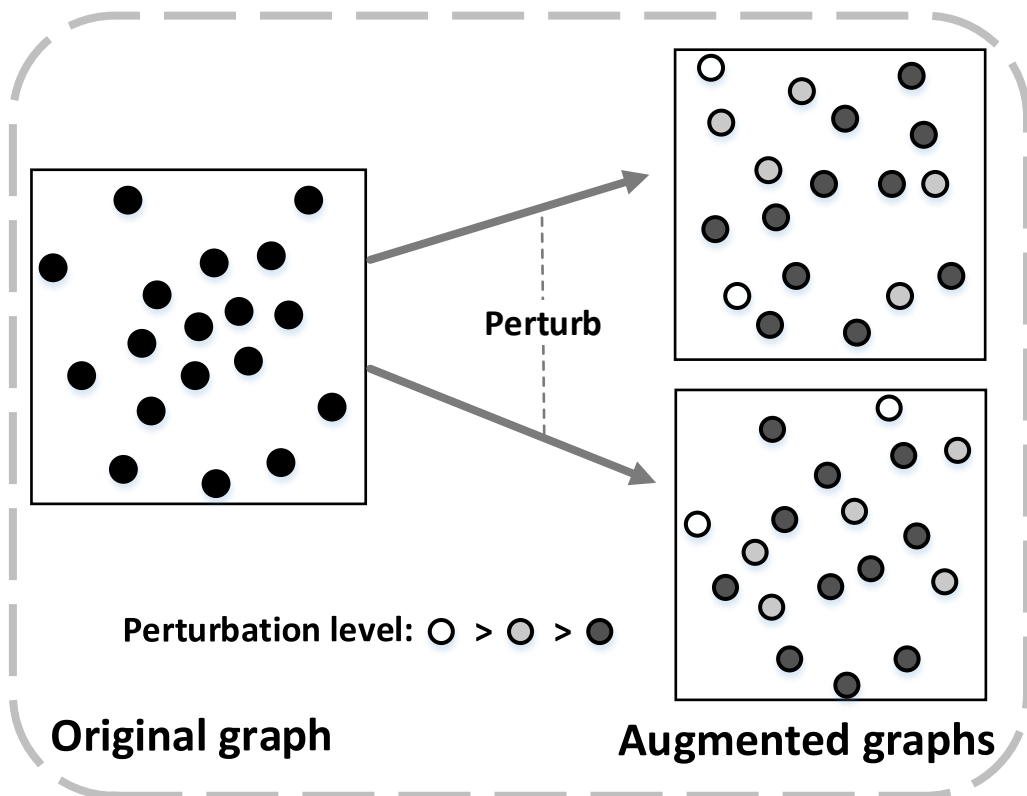

(b) Graph augmentation

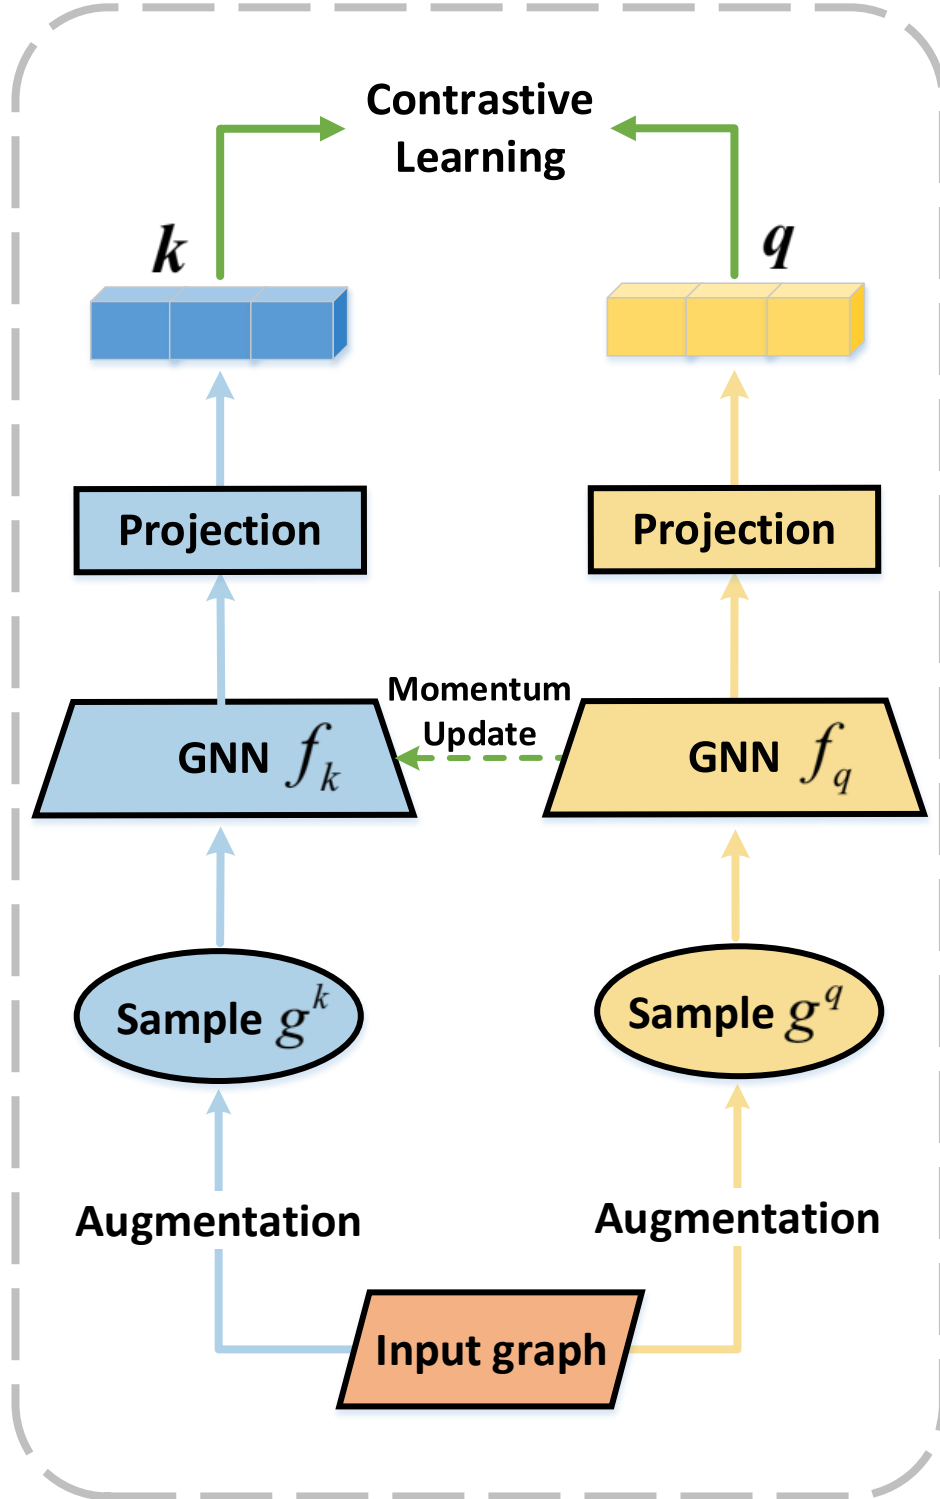

(c) Pre-training

Supplement: supplementary_material [file attachment]

## Pre-training

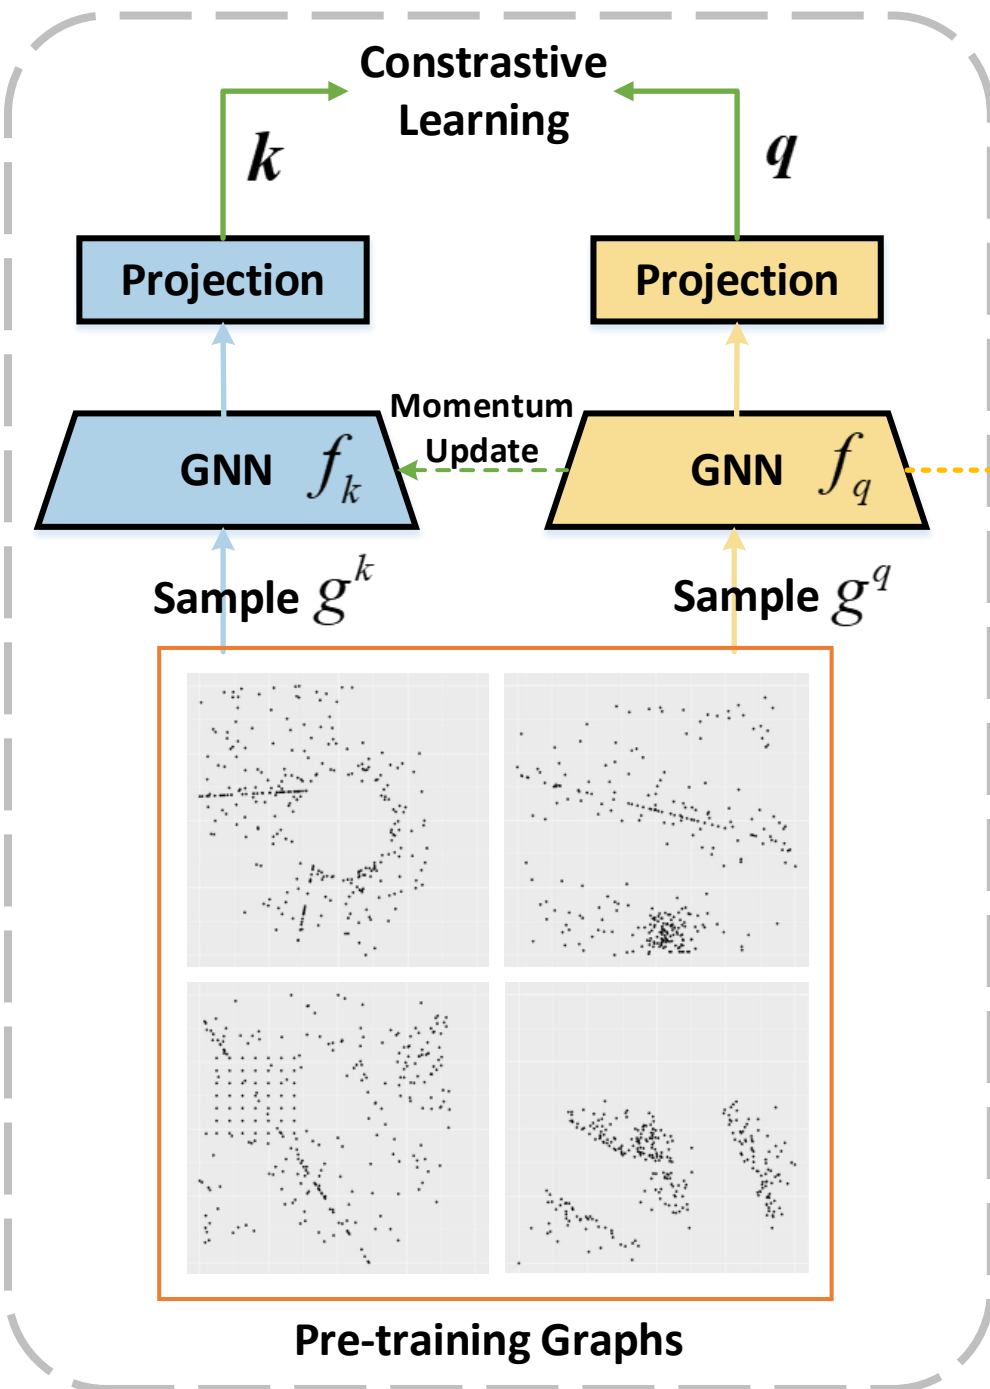

## Training

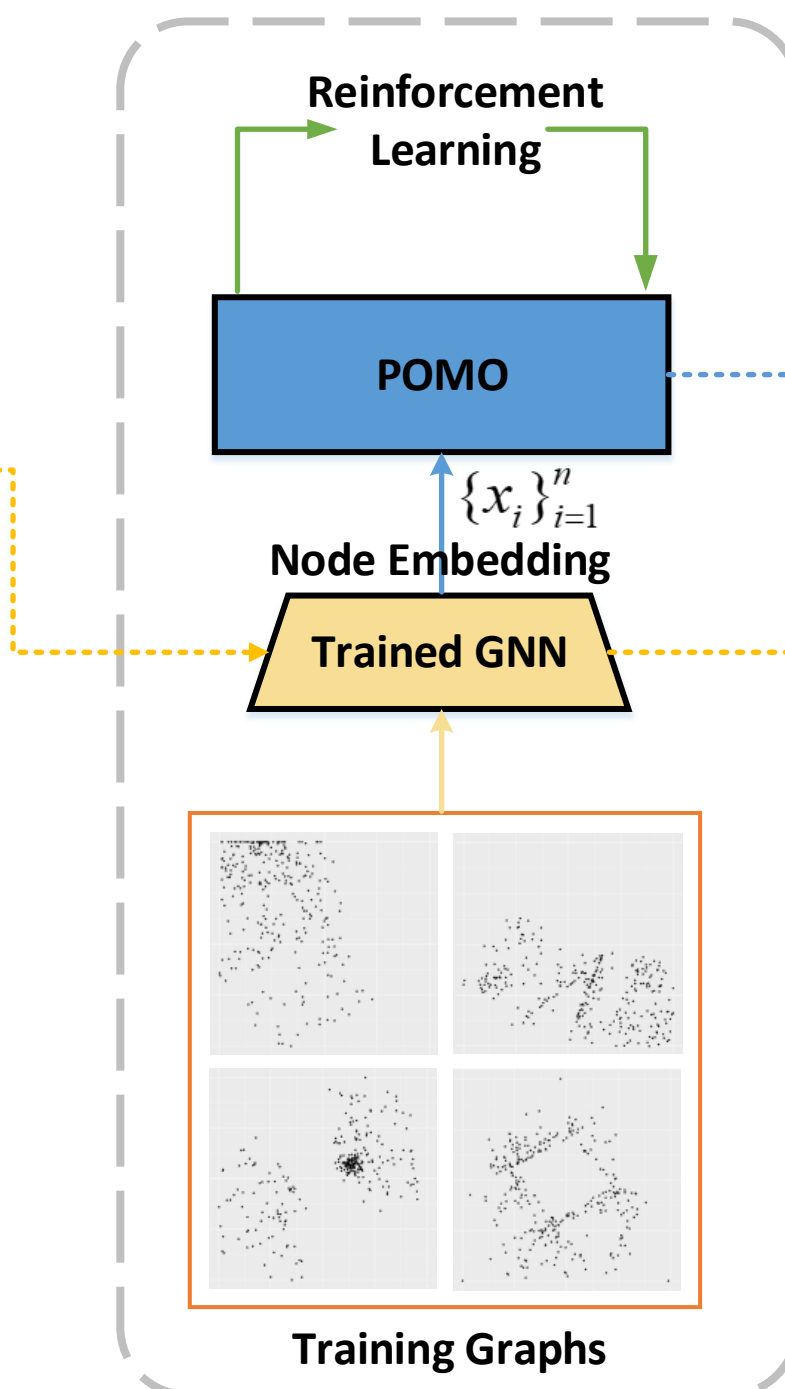

## Inference

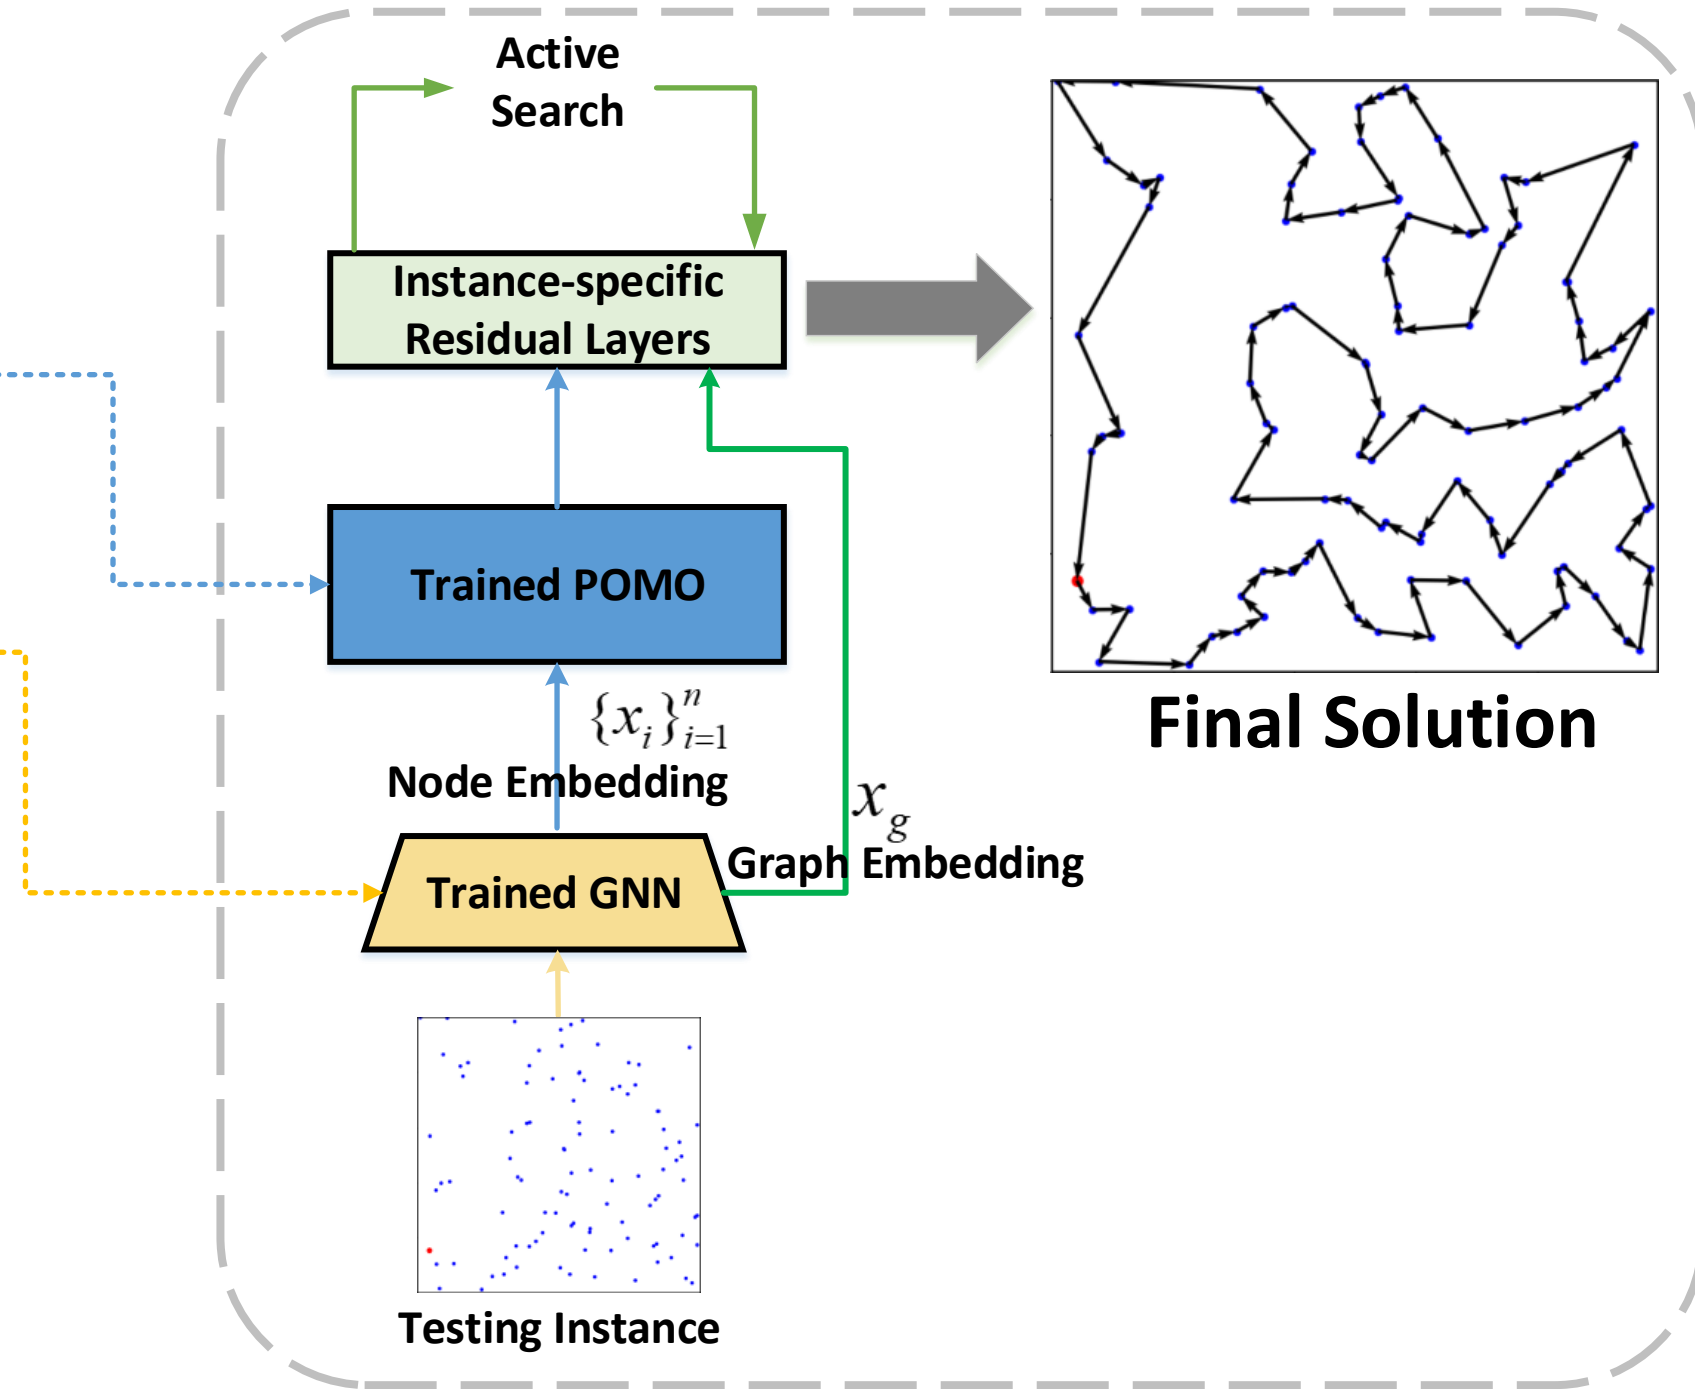

Supplement: supplementary_material [file attachment]
